# Supplementary material
Source: HighWire-hosted journal article supplement (https://mbio.asm.org/content/11/4/e01610-20)
Supplement: inline-supplementary-material-4 [file inline-supplementary-material-4.pdf]

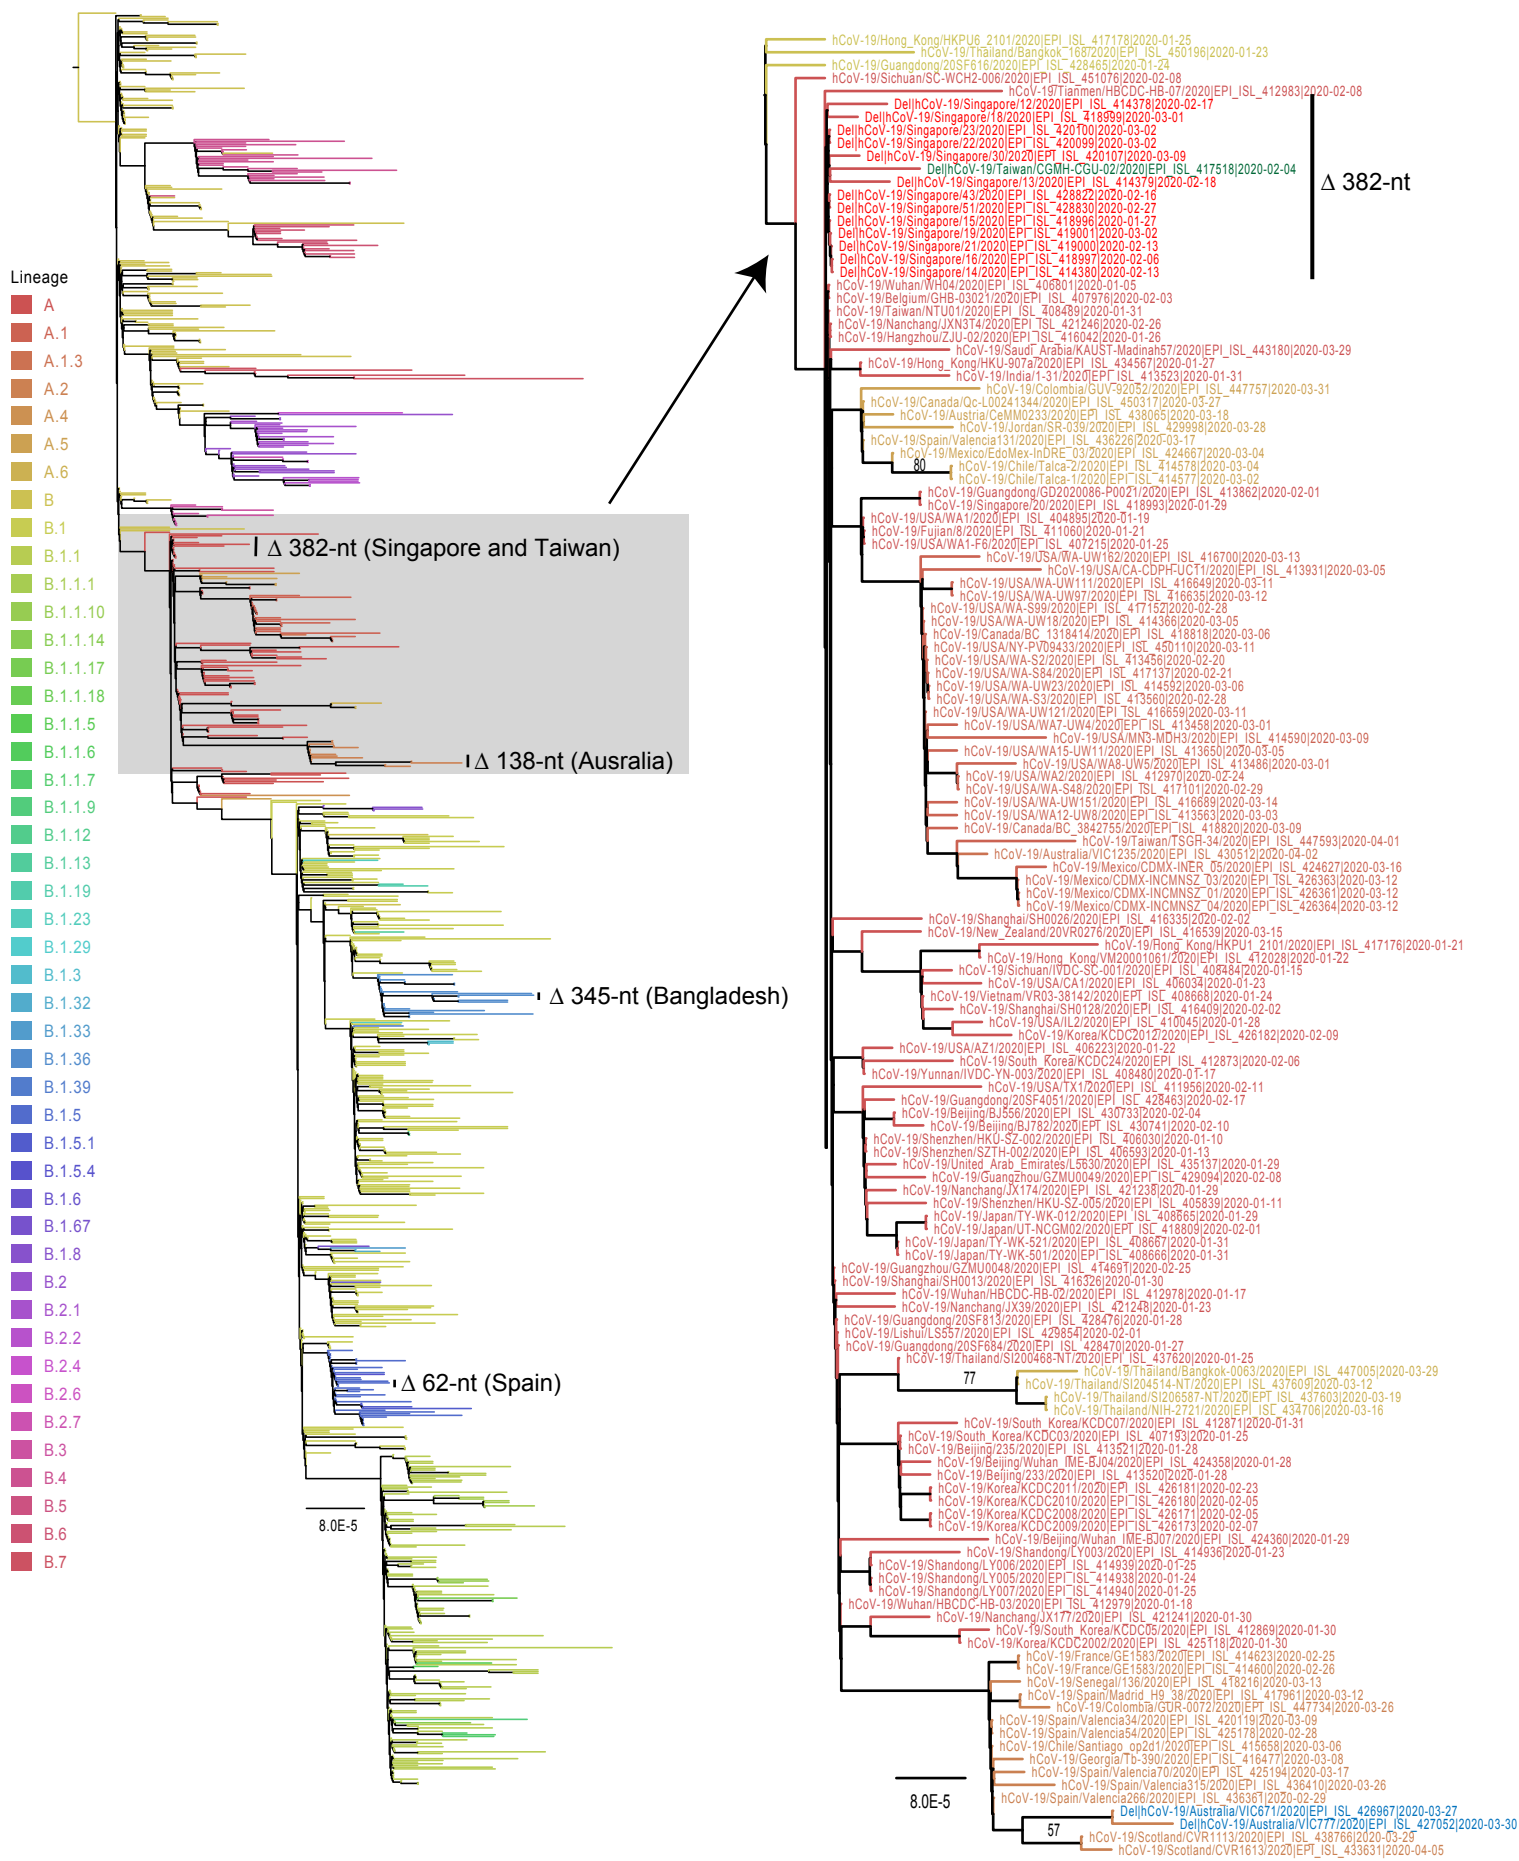

**Fig. S3.** Maximum-likelihood tree of SARS-CoV-2 genomes (n=1,038) reconstructed using RAxML with bootstrap values >50 indicated at branch nodes.
